# Supplementary material for: Syntheses, crystal structures and catalytic activities of two solvent-induced homotrinuclear Co(ii) complexes with a naphthalenediol-based bis(Salamo)-type tetraoxime ligand
Source: Royal Society of Chemistry journal article supplement (doi:10.1039/c7ra06796h), 2017-01-01
Supplement: c7ra06796h1.pdf [file c7ra06796h1.pdf]

## Supporting Information

### **Syntheses, crystal structures and catalytic activities of two solvent-induced homotrimeric Co(II) complexes with a naphthalenediol-based bis(Salamo)-type tetraoxime ligand**

Xiao-Yan Li, Le Chen, Lei Gao, Yang Zhang, Sunday Folaranmi Akogun and Wen-Kui Dong\*

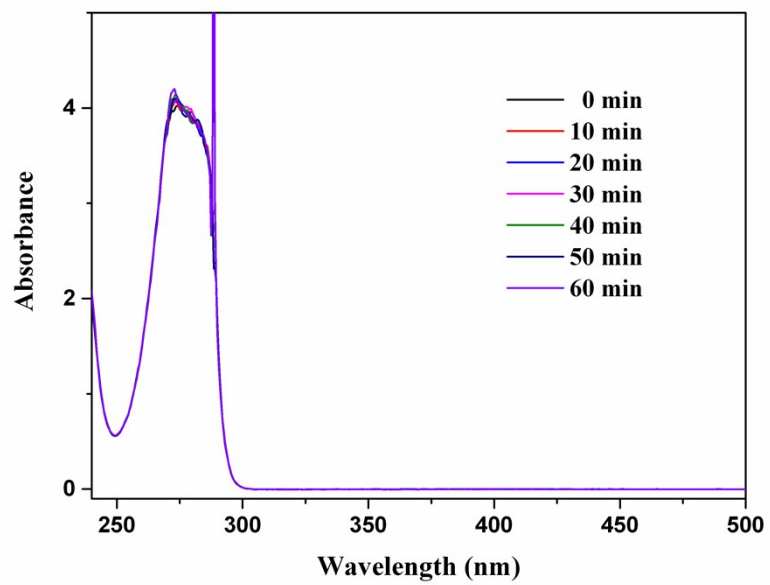

**Fig. S1** Changes observed in UV-vis spectra of 3,5-DTBC ( $2.5 \times 10^{-3}$  M) up to 60 minutes.
